# Supplementary material
Source: Research Square preprint supplement (doi:10.21203/rs.3.rs-9553579/v1)

**Scheme 1** Synthesis of n-HAP from mollusk shells.


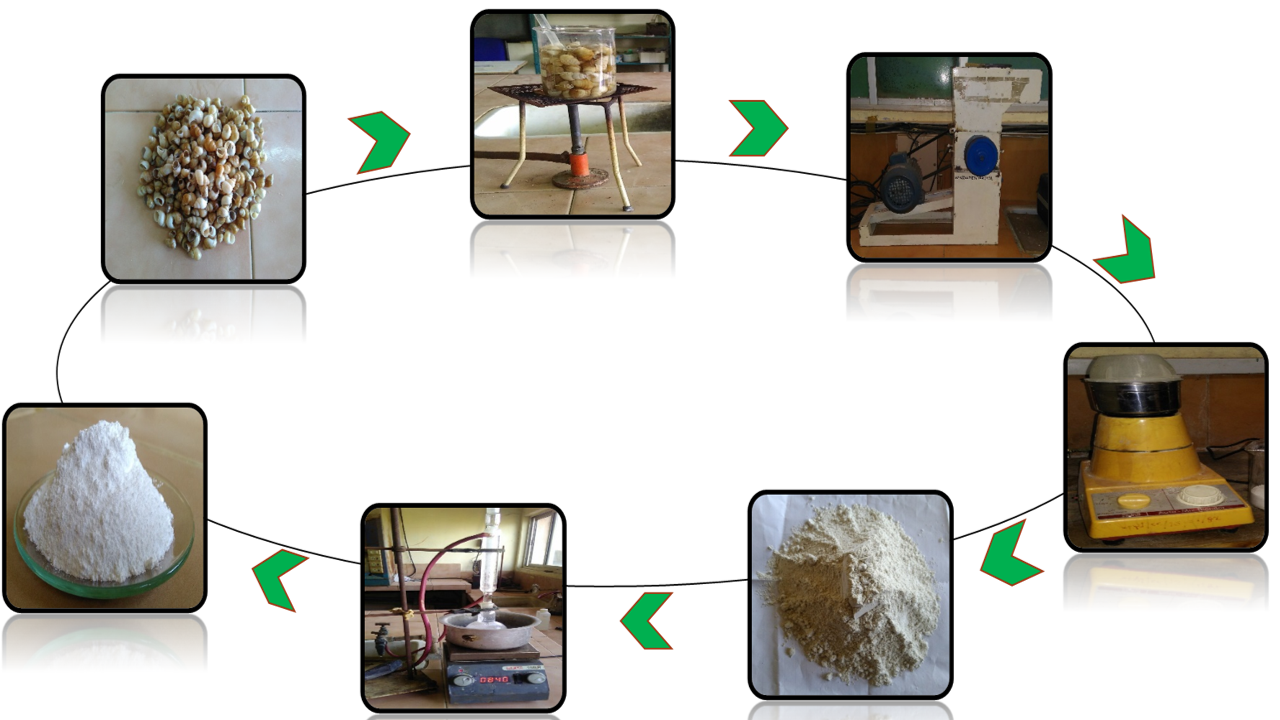

Supplement: Supplementary file 1 [file 5b48208b7c4196610ec22c2c.docx]
